# Supplementary material for: Spectra of Chromosomal Aberrations in 325 Leukemia Patients and Implications for the Development of New Molecular Detection Systems
Source: PubMed Central journal article supplement — J Korean Med Sci. 2011 Jun 20;26(7):886–92. doi: 10.3346/jkms.2011.26.7.886 (PMC3124718; doi:10.3346/jkms.2011.26.7.886), 2011-06-20
Supplement: jkms-26-886-s001.pdf [file jkms-26-886-s001.pdf]

■ **Supplemental Table 1.** ■ Frequency and distribution of chromosomal aberrations in all patients detected by multiplex RT-PCR

| Genetic rearrangement detected by multiplex RT-PCR | AML (213) |         | ALL (104) |        | MPAL (8) |       |
|----------------------------------------------------|-----------|---------|-----------|--------|----------|-------|
|                                                    | C (23)    | A (190) | C (55)    | A (49) | C (3)    | A (5) |
| t(15;17)(q21;q22) <i>PML/RARa</i>                  | 4         | 31      |           |        |          |       |
| t(9;22)(q34;q11) <i>BCR/ABL</i>                    | 1*        |         | 4         | 17     | 1        | 3     |
| t(8;21)(q22;q22) <i>AML1/MGT8</i>                  | 7         | 24      |           |        |          |       |
| 11q23 <i>MLL</i>                                   |           |         |           |        |          |       |
| t(4;11)(q21.2;q23.2) <i>MLL1/AF4</i>               |           |         | 3         | 2      |          |       |
| t(6;11)(q27;q23) <i>MLL1/AF6</i>                   |           | 2       | 1         | 1      |          |       |
| t(11;19)(q23;p13.1) <i>MLL1/ELL</i>                |           | 3       |           |        |          |       |
| t(1;11)(p32;q23) <i>MLL1/AF-1p</i>                 |           | 1       |           |        |          |       |
| t(9;11)(p22;q23) <i>MLL1/AF9</i>                   |           |         |           | 1      |          |       |
| t(10;11)(p12;q23) <i>MLL1/AF10</i>                 |           | 1       |           |        |          |       |
| t(11;19)(q23;p13.3) <i>MLL1/ENL</i>                |           |         | 1         |        |          |       |
| t(12;21)(p13;q22) <i>TEL/AML1</i>                  |           |         | 14        | 1      |          |       |
| t(1;19)(q23;p13) <i>E2A/PBX</i>                    |           |         | 4         |        |          |       |
| inv(16)(p13;q22) <i>CBFb/MYH11</i>                 |           | 3       |           |        |          |       |
| t(9;9)(q34;q34) <i>SET/CAN</i>                     | 1*        | 1       |           | 1      |          |       |
| t(9;12)(q34;p13) <i>TEL/ABL</i>                    | 1         |         | 1         |        |          |       |
| del(1p34) <i>SIL1/TAL1</i>                         |           |         | 1         |        |          |       |
| t(3;21)(q26;q22) <i>AML1/MDS1</i>                  |           | 1       |           |        |          |       |
| t(11;17)(q23;q21) <i>PLZF/RARA</i>                 |           | 1       |           |        |          |       |
| t(12;22)(p13;q11) <i>TEL/MN1</i>                   |           | 1       |           |        |          |       |
| t(16;21)(p11.2;q22.3) <i>TLS/ERG</i>               |           | 1       |           |        |          |       |
| No. of positive cases (%)                          | 13        | 70      | 29        | 23     | 1        | 3     |
|                                                    | 83 (39%)  |         | 52 (50%)  |        | 4 (50%)  |       |

\*Two fusion transcripts were detected by multiplex RT-PCR system in one sample; C, children; A, adults.

■ **Supplemental Table 2.** ■ Chromosomal alterations according to the type of malignancies and age group in all patients detected by conventional karyotyping including FISH

| Genetic rearrangement detected by Conventional karyotyping | AML (213)           |                     | ALL (104)           |                     | MPAL (8) |       |
|------------------------------------------------------------|---------------------|---------------------|---------------------|---------------------|----------|-------|
|                                                            | C (23)              | A (190)             | C (55)              | A (49)              | C (3)    | A (5) |
| t(15;17)(q21;q22) <i>PML/RARa</i>                          | 3                   | 25                  |                     |                     |          |       |
| t(9;22)(q34;q11) <i>BCR/ABL</i>                            |                     |                     | 3                   | 14                  |          | 3     |
| t(8;21)(q22;q22) <i>AML1/MGT8</i>                          | 7                   | 21                  |                     |                     |          |       |
| 11q23 <i>MLL</i>                                           |                     |                     |                     |                     |          |       |
| t(4;11)(q21.2;q23.2) <i>MLL1/AF4</i>                       |                     |                     | 2                   | 2                   |          |       |
| t(6;11)(q27;q23) <i>MLL1/AF6</i>                           |                     | 1                   |                     |                     |          |       |
| t(11;19)(q23;p13.1) <i>MLL1/ELL</i>                        |                     | 1                   |                     |                     |          |       |
| t(9;11)(p22;q23) <i>MLL1/AF9</i>                           |                     |                     |                     | 1                   |          |       |
| t(12;21)(p13;q22) <i>TEL/AML1</i>                          |                     |                     | 1                   |                     |          |       |
| t(1;19)(q23;p13) <i>E2A/PBX</i>                            |                     |                     | 1                   |                     |          |       |
| inv(16)(p13;q22) <i>CBFb/MYH11</i>                         |                     | 2                   |                     |                     |          |       |
| del(1p34) <i>SIL1/TAL1</i>                                 |                     |                     | 1                   |                     |          |       |
| t(3;21)(q26;q22) <i>AML1/MDS1</i>                          |                     | 1                   |                     |                     |          |       |
| t(11;17)(q23;q21) <i>PLZF/RARA</i>                         |                     | 1                   |                     |                     |          |       |
| t(16;21)(p11.2;q22.3) <i>TLS/ERG</i>                       |                     | 1                   |                     |                     |          |       |
| Complex karyotype*                                         | 5                   | 30                  | 11                  | 9                   | 2        |       |
| Normal karyotype                                           | 6                   | 102                 | 28                  | 20                  | 1        | 2     |
| Inappropriate specimen                                     | 1 (1 <sup>†</sup> ) | 4 (4 <sup>†</sup> ) |                     |                     |          |       |
| No mitotic cells                                           |                     | 1 (1 <sup>†</sup> ) | 8 (7 <sup>†</sup> ) | 2 (2 <sup>†</sup> ) |          |       |
| Not done                                                   | 1 (1 <sup>†</sup> ) |                     |                     | 1 (1 <sup>†</sup> ) |          |       |

\*Complex karyotypes included chromosome abnormalities including numerical aberrations which were not detected by commercial multiplex RT-PCR system; <sup>†</sup>Genetic aberrations detected by FISH analysis, which was one of the genetic aberrations in 28 fusion genes list. C, children; A, adults.

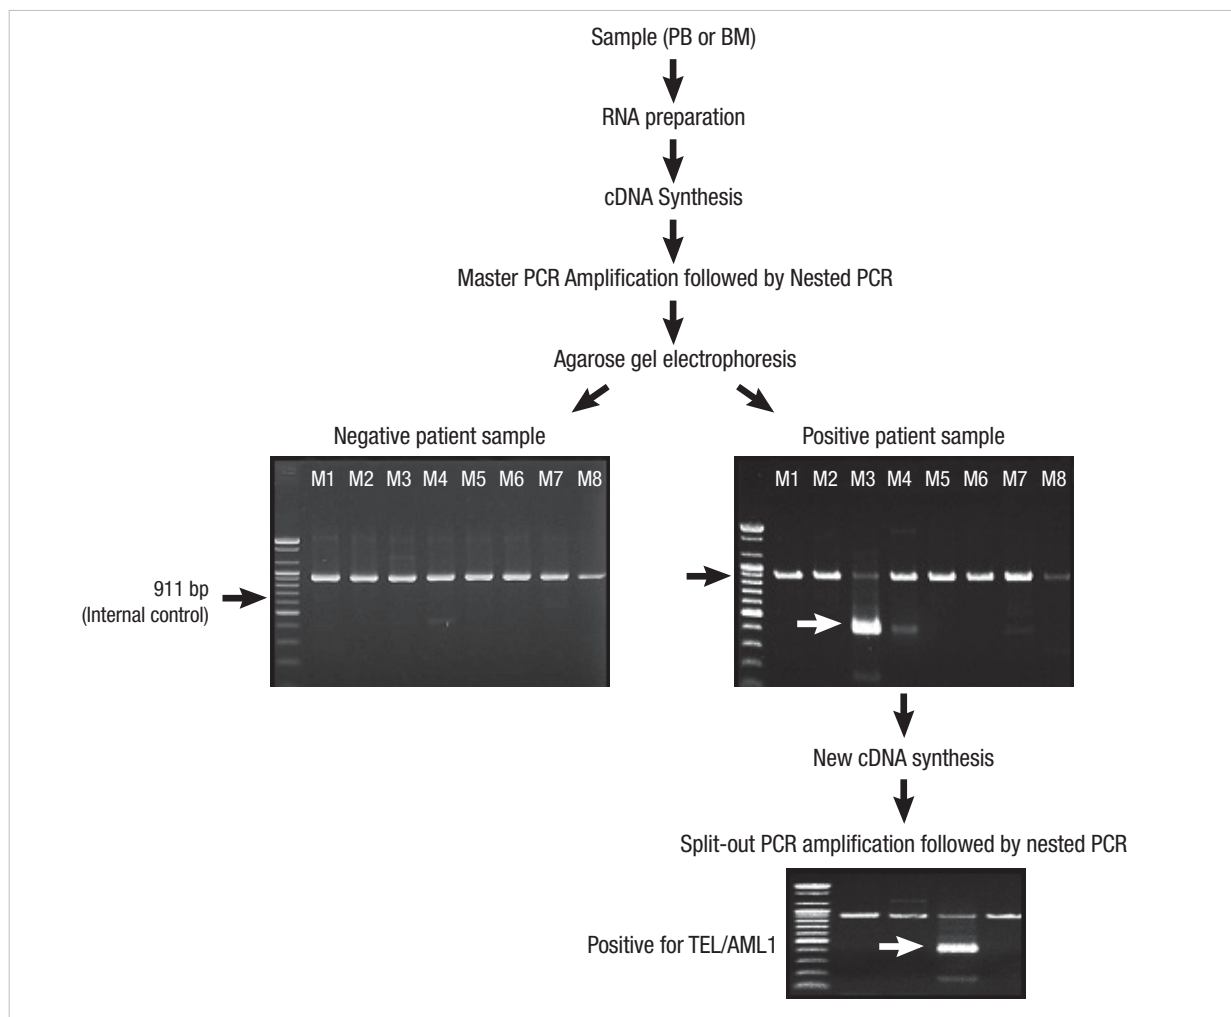

■ **Supplemental Fig. 1.** ■ Flow diagram illustrating the multiplex RT-PCR and the split-out analysis with a negative patient (left) and a positive patient (right) exhibiting a band in reaction M3 (lane 3; arrow). PB, peripheral blood; BM, bone marrow; IC, internal control.
